# Supplementary material for: Transcriptome profiling of the ventral pallidum reveals a role for pallido-thalamic neurons in cocaine reward
Source: bioRxiv or medRxiv preprint supplement (doi:10.1101/2021.10.20.465105), 2022-05-21

**a**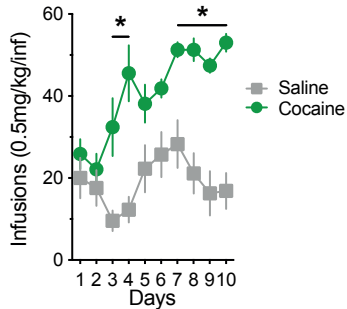**b**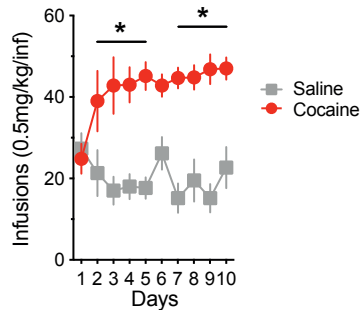**c**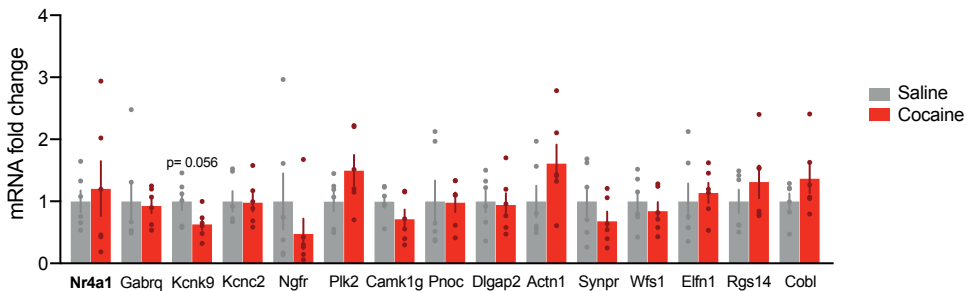

Supplement: Supplementary file [file media-1.pdf]
